# Supplementary material for: Intra-Colonial Viral Infections in Western Honey Bees (Apis Mellifera)
Source: MDPI journal article supplement (doi:10.3390/microorganisms9051087), 2021-05-18
Supplement: s1 [file s1]

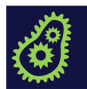

## Article

**Intra-colonial viral infections in Western honey bees (*Apis mellifera*)**

Loreley Castelli<sup>1</sup> +, María Laura Genchi García<sup>2,3,4</sup> +, Anne Dalmon<sup>5</sup>, Daniela Arredondo<sup>1</sup>, Karina Antunez<sup>1</sup>, Ciro Invernizzi<sup>6</sup>, Francisco José Reynaldi<sup>4,7</sup>, Yves Le Conte<sup>5</sup>, Alexis Beaurepaire<sup>5,8</sup> \*

**Supplementary Material**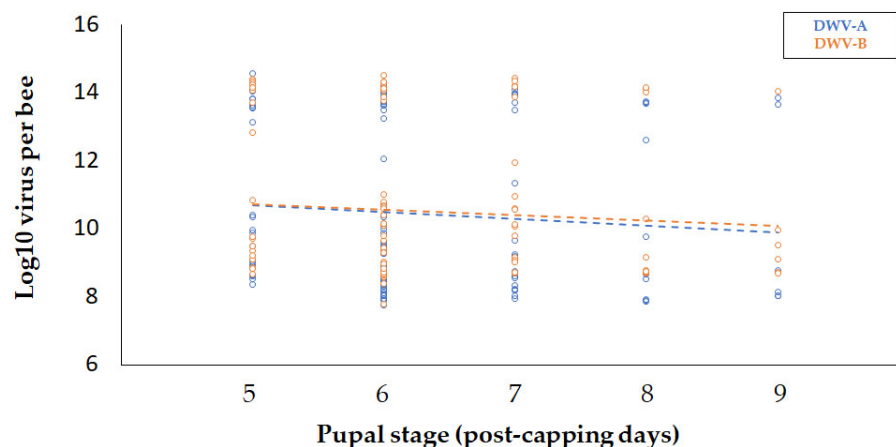

**Figure S1 - Comparison of virus levels across brood stages**

DWV strain titers of individual pupae across different brood stages are shown. The dotted lines represent regression lines. The statistical tests were non-significant for the two strains (linear regressions,  $p > 0.05$ ).

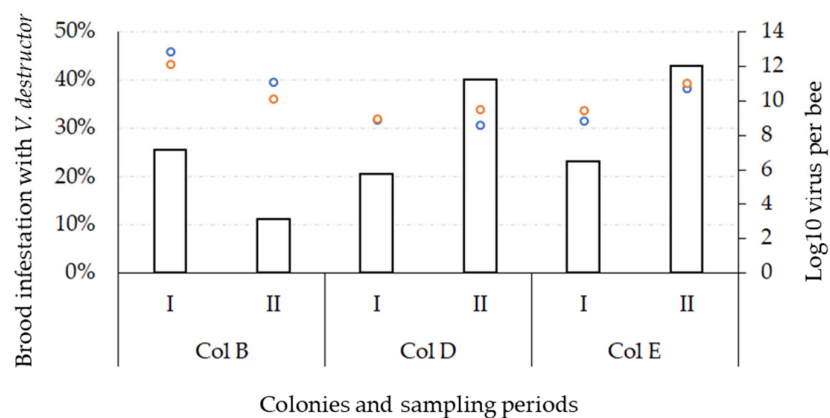

**Figure S2 - Viral loads and mite infestation levels**

Graph representing the *V. destructor* brood infestation levels at the time of sampling (columns) and the mean log10 of DWV-A (blue dots) and DWV-B (orange dots) virus genome copies (right axis).

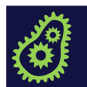**Table S1 - Standard Gene Information**

Standard genes were synthesized by Eurofins Genomics, Vector Backbone pEX-A128, Antibiotic Selection: Ampicillin, Cloning via Type IIS restriction enzymes.

| Virus<br>(size)  | Sequence                                                                                                                                                                                                                                                                                                                                                              |
|------------------|-----------------------------------------------------------------------------------------------------------------------------------------------------------------------------------------------------------------------------------------------------------------------------------------------------------------------------------------------------------------------|
| DWV-A<br>(156nt) | TACTAGTGCTGGTTTTTCCTTTGTCTTCATTAAAGCCACCTGGAACATCAGGTAA<br>GCGATGGTTGTTTGATATTGAGCTACAAGACTCGGGATGTTATCTTTGCGAG<br>GAATGCGTCCCGAACTCGAGATTCAATTATCAACGACACAGTTAATGAG                                                                                                                                                                                                  |
| DWV-B<br>(156nt) | TACTAGTGCTGGTTTTTCCTTTATCTTCATTAAAACCGCCAGGCTCTTCTGGTAA<br>GCGATGGTTGTTTGATATTGAATTACAAGATTCAGGATGTTATCTTTGAGAG<br>GGATGAGACCTGAACCTGAGATACAGTTGACAACAACCTCAGTTAATGAG                                                                                                                                                                                                 |
| BQCV<br>(294nt)  | AGTGGCGGAGATGTATGCGCTTATCGAGGAGGAGTTCGAGTTAAAGTTGTT<br>ACTGAGAAGGGTGTGGATTTCGTCAGAGCTACCGTTAGTCCTCAACAGACTT<br>ACGGCAGTGATGTCGCTCCTACTACTCATATCAGTACTCCTTTGGCAATAGAA<br>CAAATACCTATAAAGGGAGTCGCAGAGTTCCAAATACCGTACTATGCTCCAT<br>GTTTGTTCATCTTCGTTTAGAGCGAATTCGGAAACATTTTACTATAGTTCAGGTC<br>GGAATAATCTCGATATAGCCACTTCACCTCC                                            |
| ABPV<br>(197nt)  | TCATACCTGCCGATCAAGAAACAAATACTTCCAACGTACATAATACGCAACT<br>CGCGTCGACCTCTGAAGAAAACCTCAGTTGAAACGGAACAAATCACCACCTTT<br>CATGATGTGGAAACTCCAAATAGGATCAATACCCCCATGGCTCAAGACACTT<br>CATCGGCTCGGAGCATGGATGATACGCACAGTATTATTCAG                                                                                                                                                    |
| SBV<br>(335nt)   | TTGGAACACGCATTCTCTGACGAGCATGTACAAGTTCAGATGGATGATAGTG<br>TAGAAAGAGTTTATGATGAAGGGAACCAAGTCTATTACTATCCGCCCCCTAA<br>ACCAGAGGGTTTTAGTTTGAACAATGTACGGACTTCGGTTAGTACGTTGTGTA<br>ATATGCTTGGAAGTAGTAACCTCCTGAGAGAGCAATGAAAACAGCGCTGTG<br>TGCAACTCCTTATTTTGGATCAGCTTATATGACAGCTACTACCCTAGACGCTA<br>TAGGTAGTATGCAGAATACCGTTACGGGAGCTGCACACCAGTTGACTGCATC<br>TGTTGATGCGAGGTTAGAGC |



**Table S2 - Result of statistical tests comparing the levels of DWV across patriline**

N: number of patriline that were included in the analysis (sample size  $\geq 6$  per patriline), Test: test used for the comparison (KW: Kruskal Wallis when  $>2$  groups compared, if significant, Dunn test corrected with Bonferroni to compare patriline pairwise; W: Wilcoxon–Mann–Whitney tests to compare two groups). All groups compared are composed by at least 6 samples.

| Group      | N (Test)                    | DWV-A                                                                                                                                                                                             | DWV-B                       |   |   |   |                    |   |   |                            |                    |                                                                                                                                                                                                      |  |   |   |   |                             |   |   |                     |                     |
|------------|-----------------------------|---------------------------------------------------------------------------------------------------------------------------------------------------------------------------------------------------|-----------------------------|---|---|---|--------------------|---|---|----------------------------|--------------------|------------------------------------------------------------------------------------------------------------------------------------------------------------------------------------------------------|--|---|---|---|-----------------------------|---|---|---------------------|---------------------|
| Col B (I)  | 3 (KW)                      | d = 2.6169, df = 3, p = 0.45                                                                                                                                                                      | d = 0.1709, df = 3, p= 0.98 |   |   |   |                    |   |   |                            |                    |                                                                                                                                                                                                      |  |   |   |   |                             |   |   |                     |                     |
| Col D (II) | 3 (KW)                      | d = 7.7302, p = <b>0.02</b>                                                                                                                                                                       | d = 8.5439, p = <b>0.01</b> |   |   |   |                    |   |   |                            |                    |                                                                                                                                                                                                      |  |   |   |   |                             |   |   |                     |                     |
|            |                             | <table><tr><td></td><td>G</td><td>J</td></tr><tr><td>J</td><td>1.812<br/>p = 0.105</td><td>-</td></tr><tr><td>K</td><td>2.732<br/>p = <b>0.009*</b></td><td>0.920<br/>p = 0.537</td></tr></table> |                             | G | J | J | 1.812<br>p = 0.105 | - | K | 2.732<br>p = <b>0.009*</b> | 0.920<br>p = 0.537 | <table><tr><td></td><td>G</td><td>J</td></tr><tr><td>J</td><td>-2.678<br/>p = <b>0.011*</b></td><td>-</td></tr><tr><td>K</td><td>-0.325<br/>p = 1.000</td><td>2.353<br/>p = 0.0279</td></tr></table> |  | G | J | J | -2.678<br>p = <b>0.011*</b> | - | K | -0.325<br>p = 1.000 | 2.353<br>p = 0.0279 |
|            |                             |                                                                                                                                                                                                   | G                           | J |   |   |                    |   |   |                            |                    |                                                                                                                                                                                                      |  |   |   |   |                             |   |   |                     |                     |
|            |                             | J                                                                                                                                                                                                 | 1.812<br>p = 0.105          | - |   |   |                    |   |   |                            |                    |                                                                                                                                                                                                      |  |   |   |   |                             |   |   |                     |                     |
| K          | 2.732<br>p = <b>0.009*</b>  | 0.920<br>p = 0.537                                                                                                                                                                                |                             |   |   |   |                    |   |   |                            |                    |                                                                                                                                                                                                      |  |   |   |   |                             |   |   |                     |                     |
|            | G                           | J                                                                                                                                                                                                 |                             |   |   |   |                    |   |   |                            |                    |                                                                                                                                                                                                      |  |   |   |   |                             |   |   |                     |                     |
| J          | -2.678<br>p = <b>0.011*</b> | -                                                                                                                                                                                                 |                             |   |   |   |                    |   |   |                            |                    |                                                                                                                                                                                                      |  |   |   |   |                             |   |   |                     |                     |
| K          | -0.325<br>p = 1.000         | 2.353<br>p = 0.0279                                                                                                                                                                               |                             |   |   |   |                    |   |   |                            |                    |                                                                                                                                                                                                      |  |   |   |   |                             |   |   |                     |                     |
| Col E (I)  | 2 (W)                       | W = 48, p = <b>0.002388</b>                                                                                                                                                                       | W = 48, p = <b>0.002388</b> |   |   |   |                    |   |   |                            |                    |                                                                                                                                                                                                      |  |   |   |   |                             |   |   |                     |                     |
| Col E (II) | 2 (W)                       | W = 22, p = 0.8518                                                                                                                                                                                | W = 43, p = <b>0.0168</b>   |   |   |   |                    |   |   |                            |                    |                                                                                                                                                                                                      |  |   |   |   |                             |   |   |                     |                     |

**Table S3 - Results of the Wilcoxon–Mann–Whitney tests to compare cells with reproducing and non-reproducing mites**

Only groups with sample sizes  $\geq 6$  samples were compared.

| Colony | DWV-A                  | DWV-B                   |
|--------|------------------------|-------------------------|
| B      | $W = 109, p = 0.3565$  | $W = 120, p = 0.6001$   |
| D      | $W = 74.5, p = 0.2186$ | $W = 81.5, p = 0.08741$ |
